# Supplementary material for: Synthesis, characterization and reactivity study of aluminum compounds incorporating bi- and tri-dentate pyrrole–piperazine ligands
Source: Royal Society of Chemistry journal article supplement (doi:10.1039/c6ra01694d), 2016-01-01

## Electronic Supplementary Information

### Synthesis, Characterization and Reactivity Study of Aluminum

### Compounds Incorporating Bi- and Tri-dentate Pyrrole-piperazine Ligands

Ting-Chia Hu,<sup>[a]</sup> Ming-Chun Wu,<sup>[a]</sup> Shih-Sheng Wu,<sup>[a]</sup> Ching-Han Hu,<sup>[a]</sup> Chia-Her

Lin,<sup>[b]</sup> Amitabha Datta,<sup>[a]</sup> Tzung-Han Lin,<sup>[a]</sup> Jui-Hsien Huang<sup>[a,\*]</sup>

1. CIF files of compounds **7** and **8**
2. <sup>1</sup>H NMR spectrum of a mixture of **3** and **4** in CDCl<sub>3</sub> using 300 MHz NMR spectrometer. ● represents compound **4** and ○ indicates compound **3**.

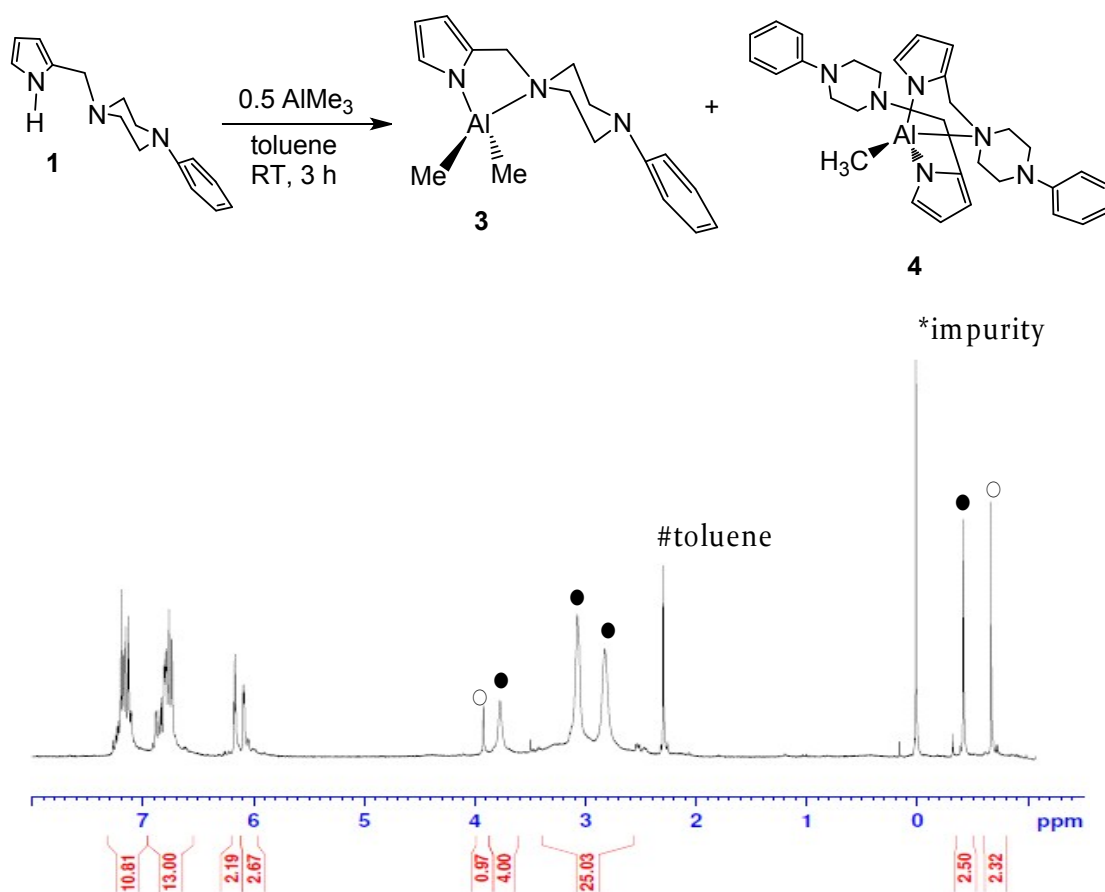

Supplement: c6ra01694d1.pdf [file c6ra01694d1.pdf]
